# Supplementary material for: The ethical issues regarding consent to clinical trials with pre-term or sick neonates: a systematic review (framework synthesis) of the analytical (theoretical/philosophical) research
Source: PubMed Central journal article supplement (PMC5016881; doi:10.1186/s13063-016-1562-3), 2016-09-09

Additional file 2 PRISMA Flow Diagram for analytic papers

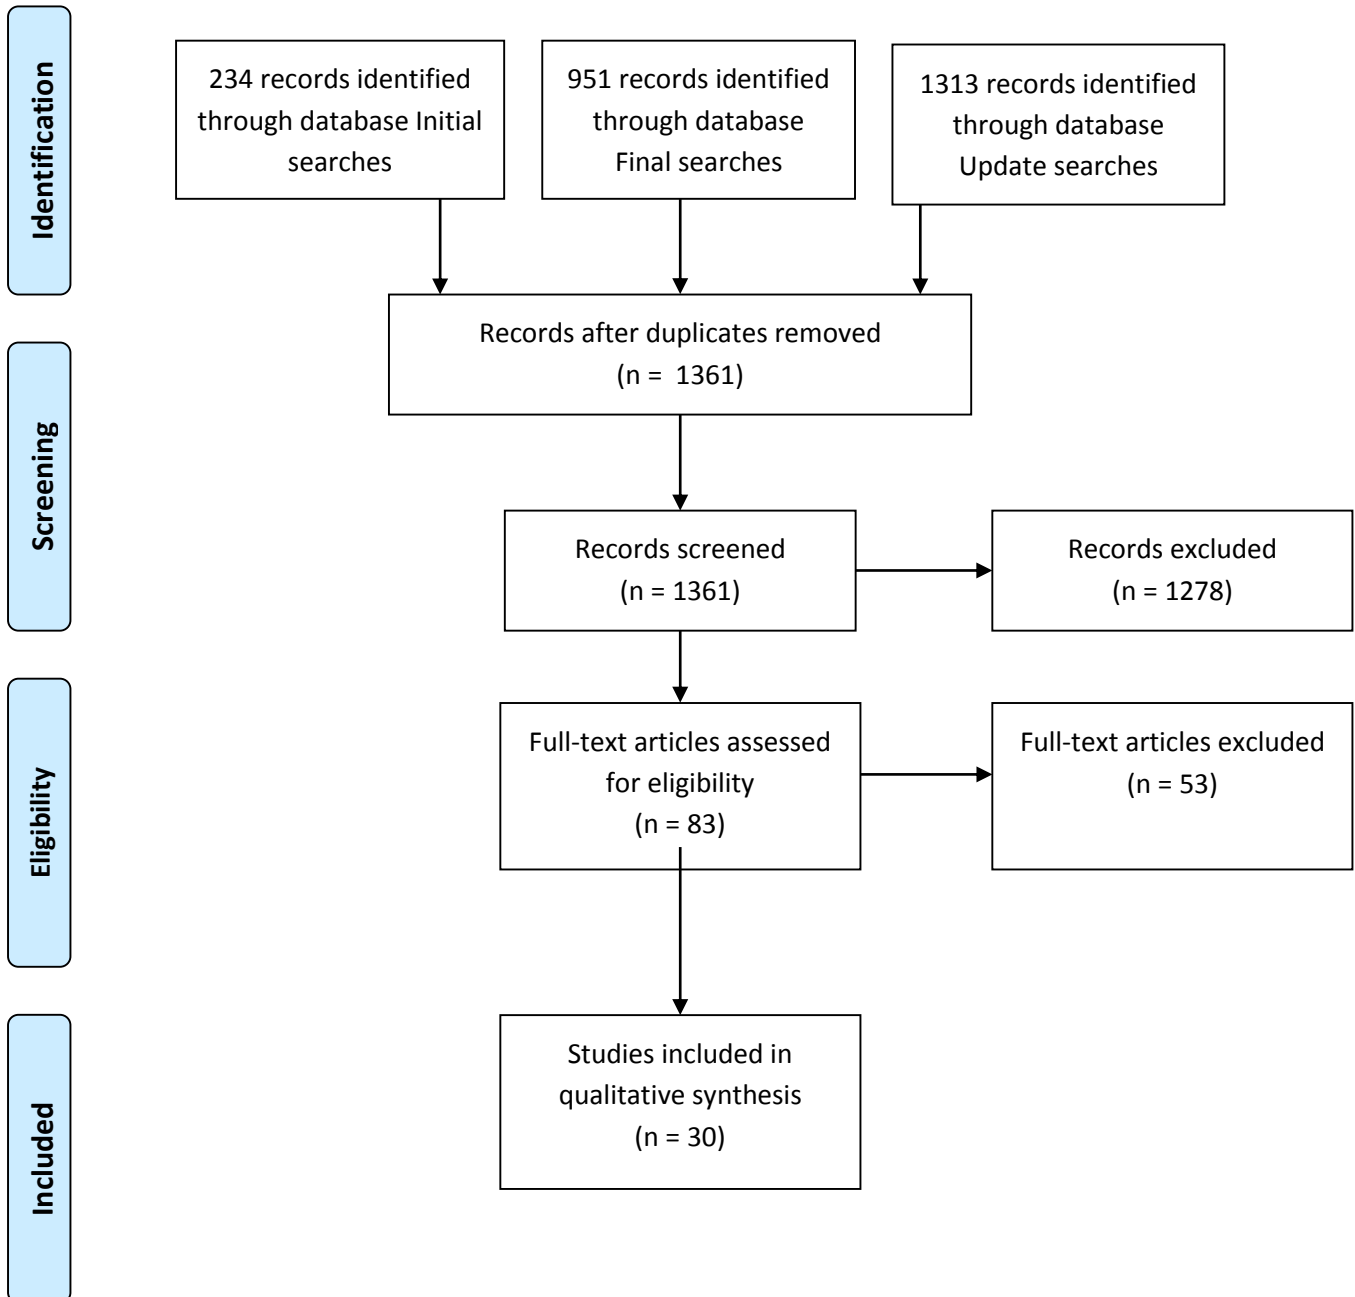

Supplement: 13063_2016_1562_MOESM2_ESM.pdf [file 13063_2016_1562_MOESM2_ESM.pdf]
